# Supplementary material for: AIEgens for real-time naked-eye sensing of hydrazine in solution and on a paper substrate: structure-dependent signal output and selectivity
Source: Royal Society of Chemistry journal article supplement (doi:10.1039/c5tc01496d), 2015-06-23
Supplement: c5tc01496d1.pdf [file c5tc01496d1.pdf]

## Electronic Supplementary Information

### **AIEgens for real-time naked-eye sensing of hydrazine in solution and on paper substrate: structure-dependent signal output and selectivity**

Ruoyu Zhang, <sup>‡a</sup> Chong-Jing Zhang, <sup>‡a</sup> Zhegang Song, <sup>b</sup> Jing Liang, <sup>a</sup> Ryan Tsz Kin Kwok, <sup>b</sup> Ben Zhong Tang, <sup>b,c</sup> Bin Liu <sup>\*a,d</sup>

<sup>a</sup> *Department of Chemical and Biomolecular Engineering, National University of Singapore, 4 Engineering Drive 4, Singapore 117585, E-mail: [cheliub@nus.edu.sg](mailto:cheliub@nus.edu.sg)*

<sup>b</sup> *Department of Chemistry, Division of Biomedical Engineering, The Hong Kong University of Science and Technology, Clear Water Bay, Kowloon, Hong Kong, China*

<sup>c</sup> *SCUT-HKUST Joint Research Laboratory, Guangdong Innovative Research Team, State Key Laboratory of Luminescent Materials & Devices, South China University of Technology, Guangzhou 510640, China*

<sup>d</sup> *Institute of Materials Research and Engineering (A\*STAR), 3 Research Link, Singapore 117602*

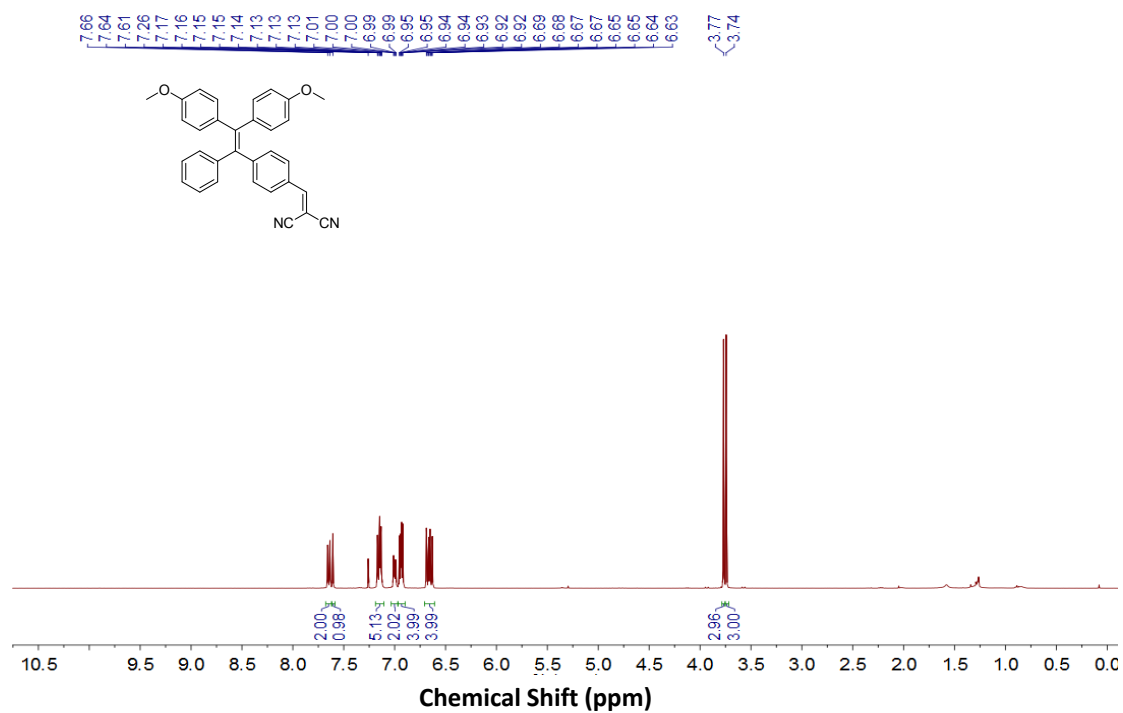

**Figure S1.** <sup>1</sup>H NMR spectrum of MTPE-DCV in CDCl<sub>3</sub>.

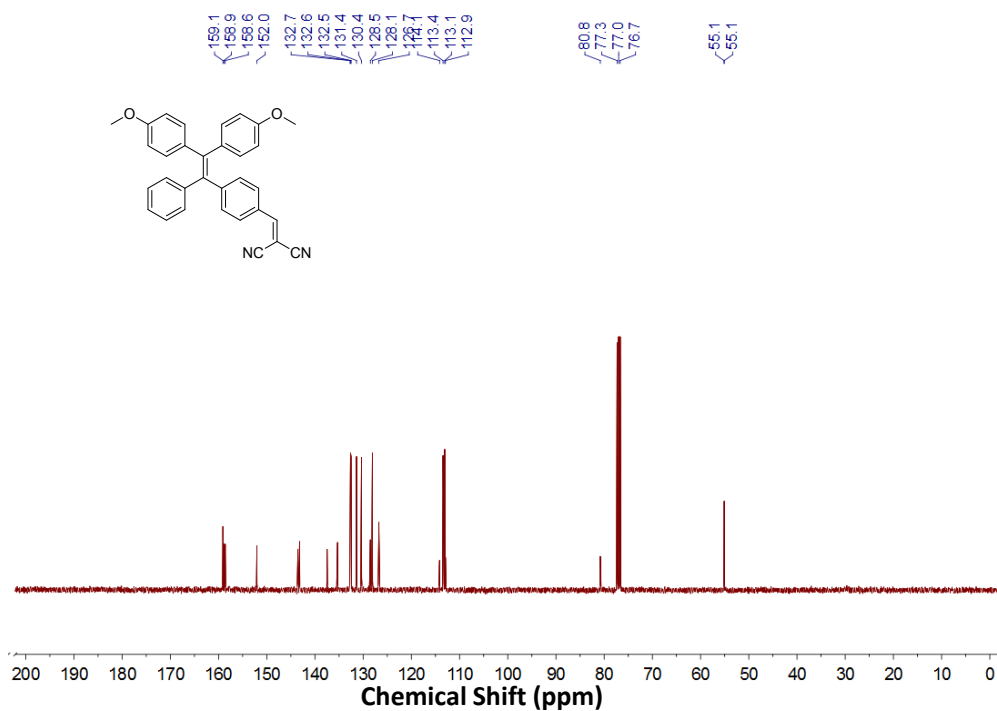

**Figure S2.** <sup>13</sup>C NMR spectrum of MTPE-DCV in CDCl<sub>3</sub>.

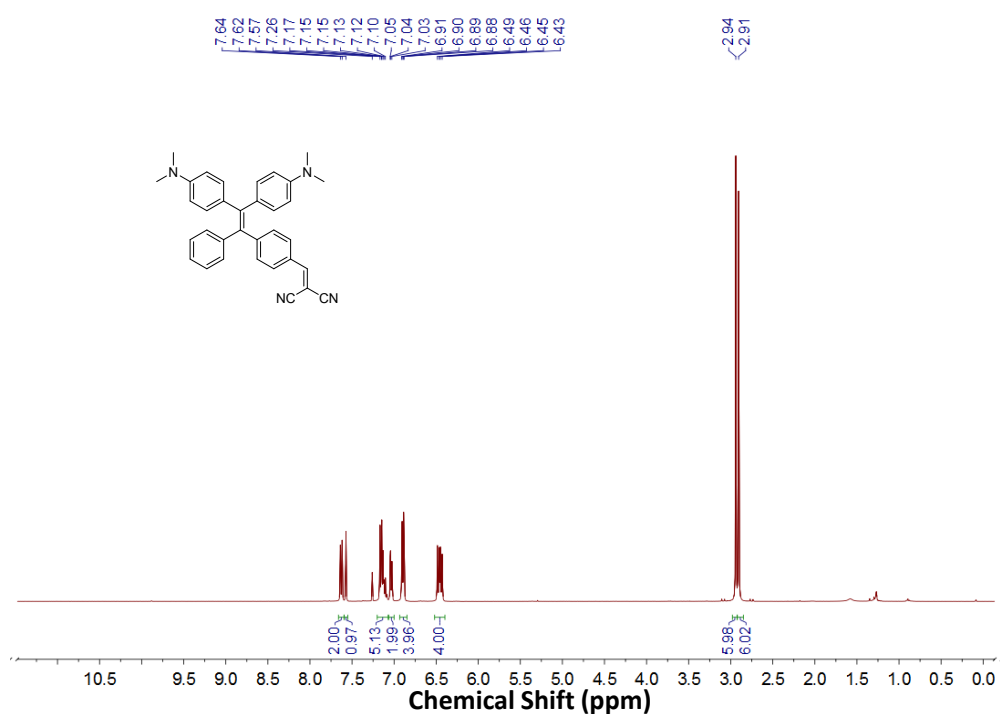

**Figure S3.**  $^1\text{H}$  NMR spectrum of NTPE-DCV in  $\text{CDCl}_3$ .

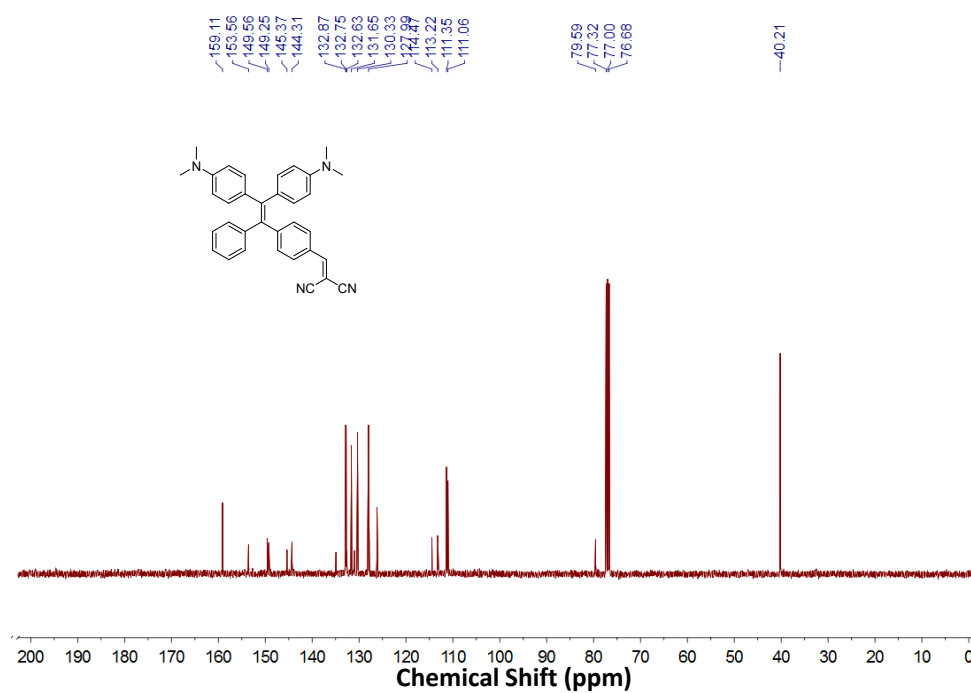

**Figure S4.**  $^{13}\text{C}$  NMR spectrum of NTPE-DCV in  $\text{CDCl}_3$ .

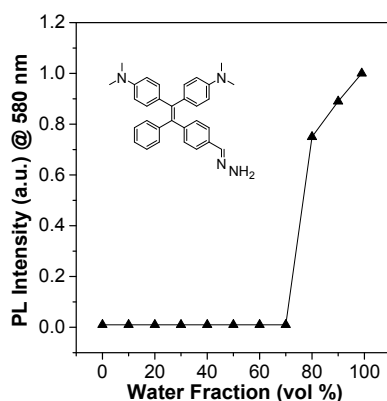

**Figure S5.** Plots of the maximum PL intensity of 10  $\mu\text{M}$  hydrazone product of NTPE-DCV against water fractions (vol %) in the solvent mixture of DMSO- $\text{H}_2\text{O}$ .  $\lambda_{\text{ex}} = 380 \text{ nm}$ .

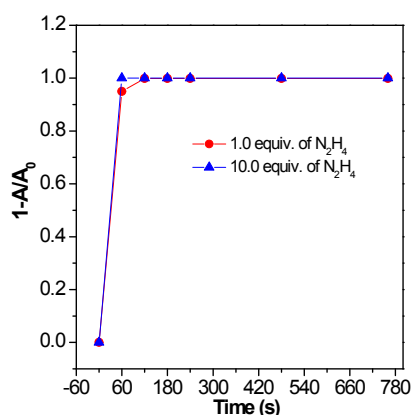

**Figure S6.** The plot of normalized changes in UV-vis absorbance ( $1-A/A_0$ ) of 100  $\mu\text{M}$  NTPE-DCV upon addition of 1.0, and 10.0 equiv. of hydrazine over different time scales in the mixture of DMSO- $\text{H}_2\text{O}$  ( $v/v = 9/1$ ).

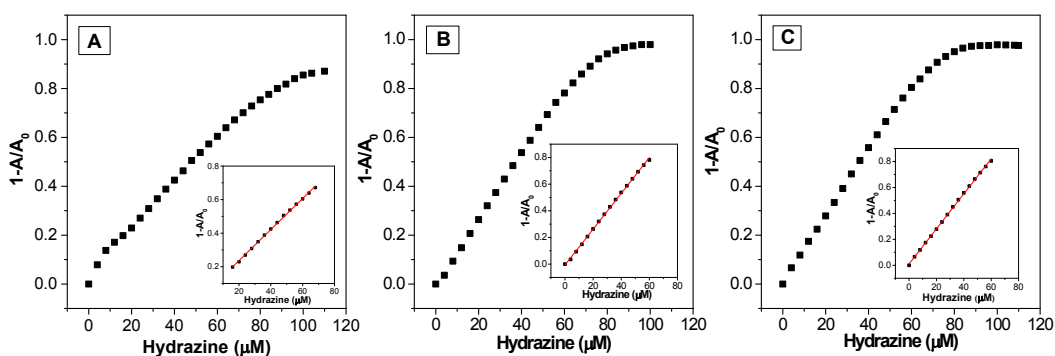

**Figure S7.** The plot of normalized changes in UV-vis absorption ( $1-A/A_0$ ) of 100  $\mu\text{M}$  (A) TPE-DCV, (B) MTPE-DCV, and (C) NTPE-DCV against the concentration of hydrazine (0–110  $\mu\text{M}$ ) in DMSO-PBS buffer (10 mM, pH = 7.4,  $v/v = 9/1$ ); the inset shows the linear regions of the plots, respectively.

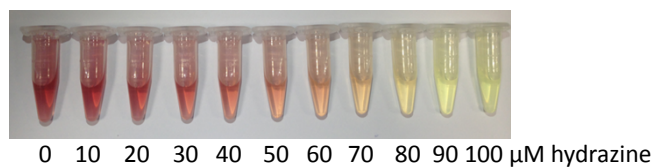

**Figure S8.** Photographs of 100  $\mu\text{M}$  NTPE-DCV in DMSO-PBS buffer (10 mM, pH = 7.4, v/v = 9:1) after incubation with 0, 10, 20, 30, 40, 50, 60, 70, 80, 90, and 100  $\mu\text{M}$  hydrazine. (Photographs were taken under natural light.)

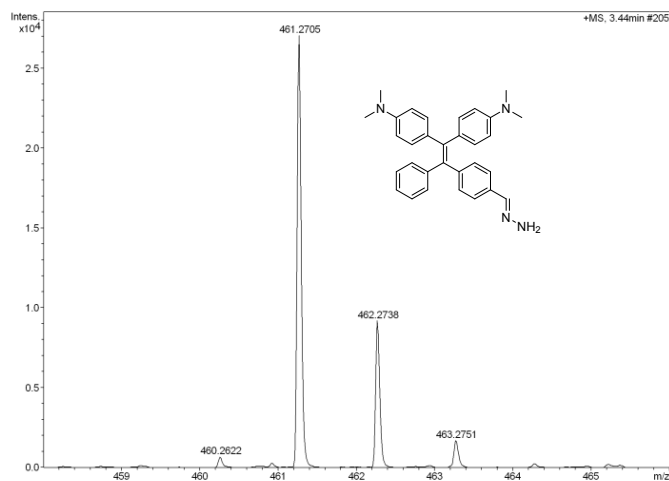

**Figure S9.** HRMS (ESI) spectrum of the hydrazone product of NTPE-DCV with hydrazine. m/z  $[\text{M}+\text{H}]^+$  calcd for  $\text{C}_{31}\text{H}_{33}\text{N}_4$ : 461.2705; found: 461.2705.
